# Supplementary material for: The neutralizing role of IgM during early Chikungunya virus infection
Source: PubMed Central journal article supplement (PMC5300252; doi:10.1371/journal.pone.0171989), 2017-02-09

# S4 Fig

**A**

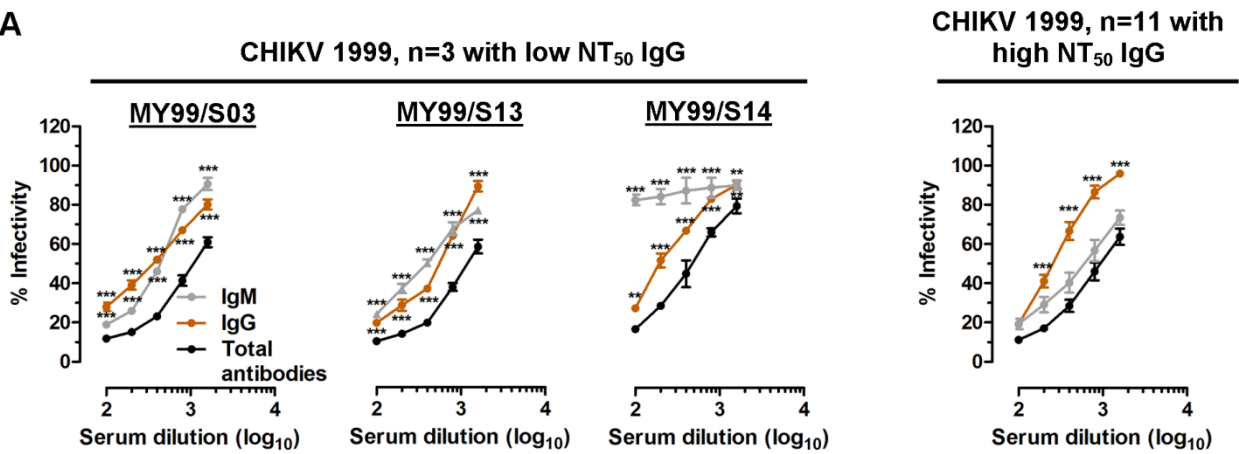

**B**

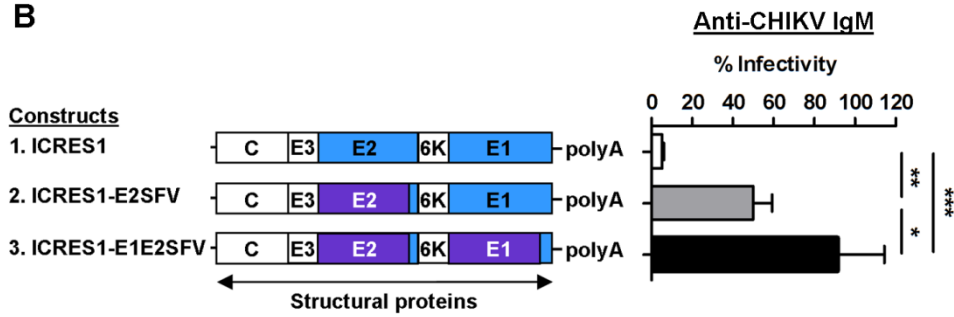

Supplement: pone.0171989.s004.pdf [file pone.0171989.s004.pdf]
